# Supplementary material for: Selective extraction of light polycyclic aromatic hydrocarbons in environmental water samples with pseudo-template thin-film molecularly imprinted polymers
Source: Royal Society of Chemistry journal article supplement (doi:10.1039/c4ay02849j), 2015-01-01
Supplement: c4ay02849j1.pdf [file c4ay02849j1.pdf]

## Electronic Supplementary Material

**S-Table 1.** PAHs and MIP components structures

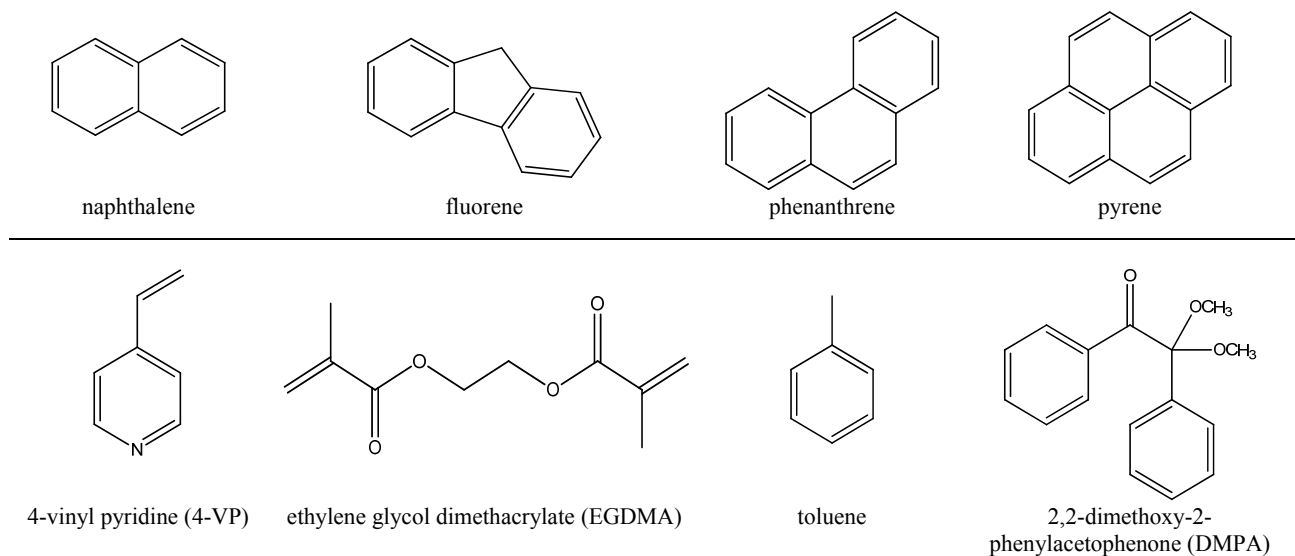

**S-Table 2.** MIP and NIP composition

| Pre-polymer component | MIP                        | NIP                       |
|-----------------------|----------------------------|---------------------------|
| toluene               | 4.25 $\mu$ L (0.0405 mmol) | –                         |
| 4-VP                  | 17.0 $\mu$ L (0.158 mmol)  | 17.0 $\mu$ L (0.158 mmol) |
| EGDMA                 | 151 $\mu$ L (0.801 mmol)   | 151 $\mu$ L (0.801 mmol)  |
| DMPA                  | 3.20 mg (0.0125 mmol)      | 3.20 mg (0.0125 mmol)     |
| 1-octanol             | 200 $\mu$ L (1.26 mmol)    | 204 $\mu$ L (1.28 mmol)   |

**S-Table 3.** GC-MS settings: Quantifier and qualifier ions used to identify the PAHs

|                              | Quantifier (m/z) | Qualifier (m/z) |
|------------------------------|------------------|-----------------|
| naphthalene                  | 128              | 127             |
| fluorene                     | 165              | 166             |
| phenanthrene                 | 178              | 176             |
| pyrene                       | 202              | 200             |
| octane                       | 114              | 85              |
| octanol                      | 97               | 84              |
| p- cresol                    | 108              | 107             |
| acenaphthene d <sub>10</sub> | 162              | 158             |

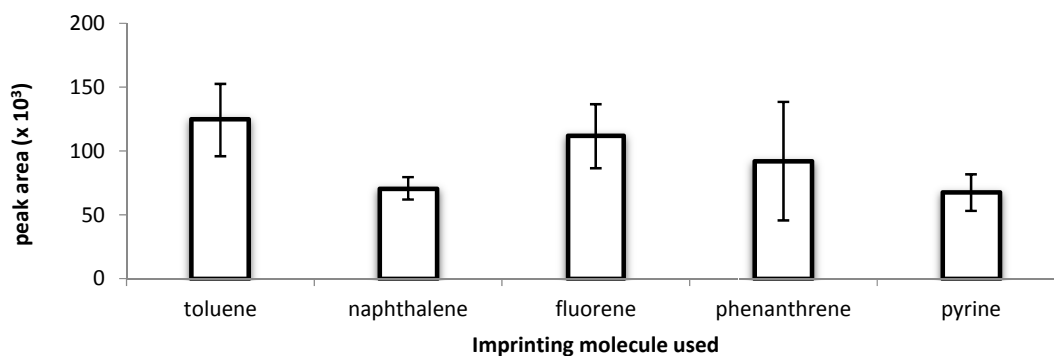

**S-Fig. 1** Peak area corresponding to total PAH uptake from  $0.1 \mu\text{g L}^{-1}$  for two hours PAHs, for MIPs with different templates; GC-MS in SIM mode

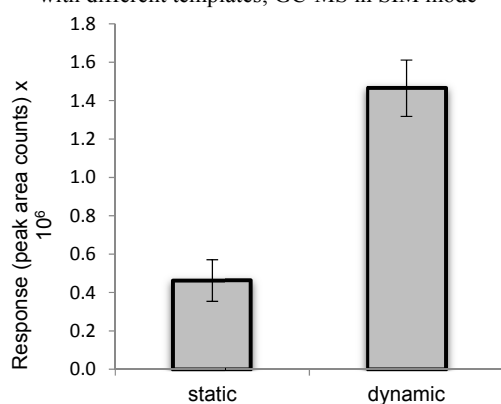

**S-Fig. 2.** Effect of stirring over the total PAH uptake of the MIP over 18 h, expressed in terms of the detector signal

**S-Table 4.** Physicochemical properties and carcinogenic potency of the PAHs studied

| Compound     | MW     | Log $K_{ow}$ | Water solubility at 25°C ( $\text{mg L}^{-1}$ ) | Melting point (°C) | Vapour pressure at 25 °C (mPa) | Carcinogenic potency (IARC/US EPA classification) | Concentration in produced water ( $\mu\text{g L}^{-1}$ ), [29] |
|--------------|--------|--------------|-------------------------------------------------|--------------------|--------------------------------|---------------------------------------------------|----------------------------------------------------------------|
| naphthalene  | 128.16 | 3.5          | 31.7                                            | 80.5               | 11960                          |                                                   | 5.3-394                                                        |
| fluorine     | 166    | 4.18         | 1.98                                            | 116.5              | 94.7                           |                                                   | 0.06- 21.7                                                     |
| phenanthrene | 178.24 | 4.5          | 1.29                                            | 101                | 90.7                           | 3                                                 | 0.11- 32.0                                                     |
| pyrene       | 202.26 | 4.9          | 0.135                                           | 156                | $91.3 \times 10^{-6}$          | 3                                                 | 0.01- 1.9                                                      |
| toluene      | 92     | 2.69         |                                                 |                    |                                |                                                   | –                                                              |
| 1-octanol    |        | 2.8-3.15     |                                                 |                    |                                |                                                   | –                                                              |

3-possibly carcinogenic to human

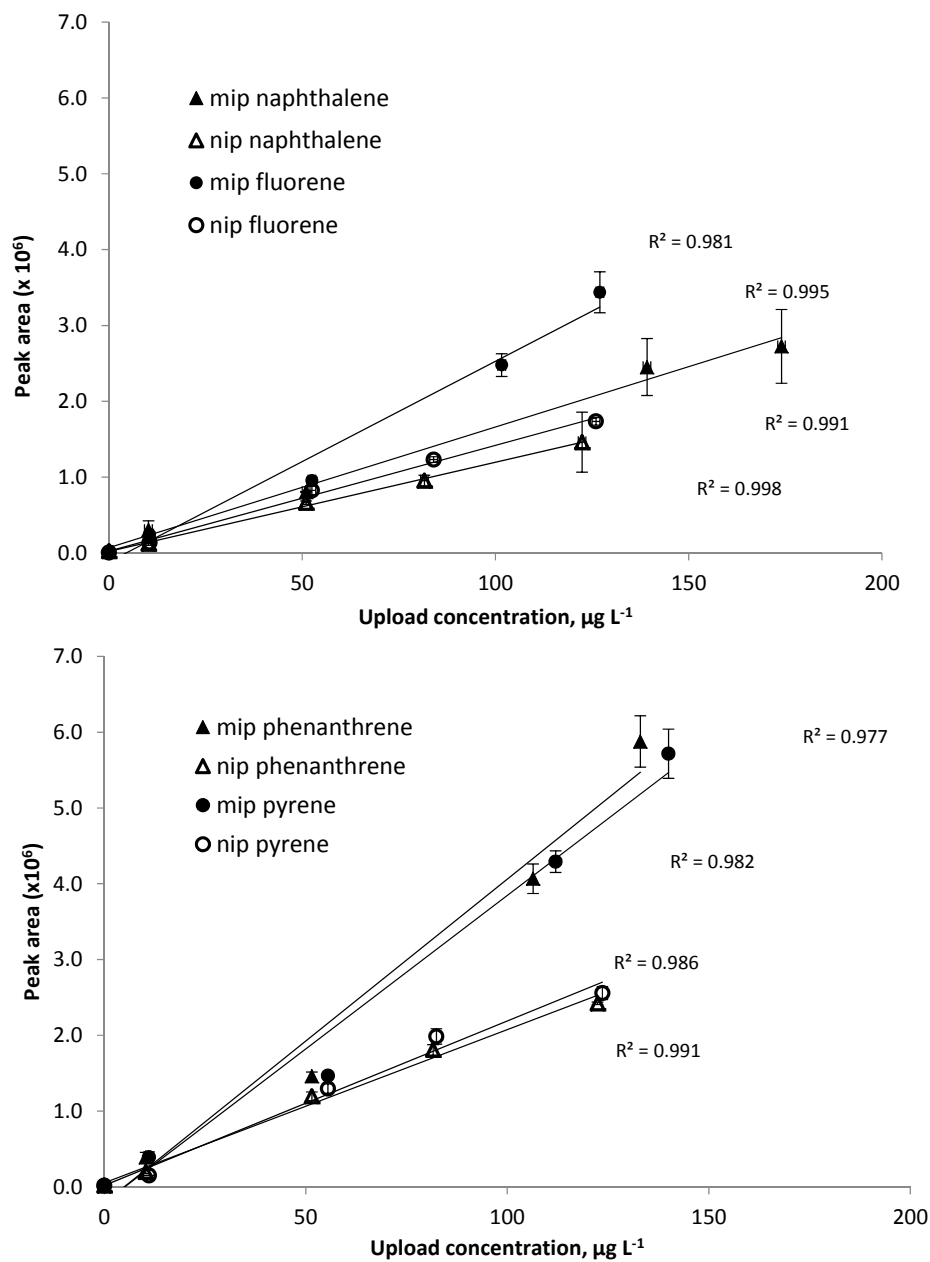

**S-Fig. 3.** Increase in detector response with the concentration in the upload solution: (a) for naphthalene and fluorene (b) for phenanthrene and pyrene; experimental conditions of 80.0 mL sample for two hours, GC-MS in SIM mode. Bars represent standard deviation.
